# Supplementary material for: Aggregation induced enhanced emission of conjugated dendrimers with a large intrinsic two-photon absorption cross-section
Source: Royal Society of Chemistry journal article supplement (doi:10.1039/c3py00974b), 2013-08-28
Supplement: c3py00974b.pdf [file c3py00974b.pdf]

Supporting Information for

# Aggregation Induced Enhanced Emission of Conjugated Dendrimers with Large Intrinsic Two-Photon Absorption Cross Section

Bin Xu<sup>a</sup>, Jibo Zhang<sup>a</sup>, Honghua Fang<sup>b</sup>, Suqian Ma<sup>a</sup>, Qidai Chen<sup>b</sup>, Hongbo Sun<sup>b</sup>, Chan Im<sup>c</sup>, and Wenjing Tian<sup>\*a</sup>

<sup>a</sup> State Key Laboratory of Supramolecular Structure and Materials, Jilin University, Changchun 130012 P. R. China.

<sup>b</sup> State Key Laboratory on Integrated Optoelectronics, Jilin University, Changchun 130012 P. R. China.

<sup>c</sup> Department of Chemistry, Konkuk University, Seoul, 143701, Korea

## Table of Contents:

1. Synthesis and characterization of compounds
2. TEM images of microstructure of dendrimers and Dynamic Light Scattering ( DLS ) measurements
3. Photophysical properties of dendrimers
4. Semiempirical Calculation Methods for dendrimers
5. <sup>1</sup>H and <sup>13</sup>C NMR spectra, MALDI-TOF MS data for compounds

## 1. Synthesis and characterization of compounds:

The compounds of 1, 2, 3 and 4 were readily obtained according to the literature procedures.<sup>18</sup>

**Synthesis of 5:** A round-bottomed flask (50 ML) was oven dried and cooled under N<sub>2</sub> atmosphere. 4-(4-(diphenylamino) styryl)-N-(4-(4-(diphenylamino)styryl)phenyl)-N-(4-vinylphenyl)-aniline **4** (1.6g, 2 mmol), 4-(bis(4-iodophenyl)amino) benzaldehyde **2** (0.48 g, 0.9 mmol), K<sub>3</sub>PO<sub>4</sub> (0.58 g, 2.7 mmol) and 5mg Pd(OAc)<sub>2</sub> were dissolved in dry DMAc (20 ml). The reaction mixture was heated to 110 °C in an oil bath and stirred for 24h at this temperature. After being cooled to room temperature, the reaction mixture was poured into the water and extracted with CH<sub>2</sub>Cl<sub>2</sub>. The combined organic extracts were washed with brine, dried (MgSO<sub>4</sub>), and concentrated to dryness under vacuum. The crude product was purified by flash column chromatography (petroleum ether/CH<sub>2</sub>Cl<sub>2</sub>=1:1) to give second generation aldehyde-focused dendron as a yellow solid. Then, in an oven-dried flask, second generation aldehyde-focused dendron (2 g, 1.06 mmol) and methyltriphenyl-phosphonium bromide (0.54 g, 1.5 mmol) were dissolved in 100 ml of dry THF. t-BuOK (0.20 mg, 1.8 mmol) in 50 ml of dry THF was added dropwise slowly to the resulting solution at 0 °C, then the reaction mixture was warmed to room temperature and stirred under N<sub>2</sub> atmosphere for 10h. The reaction mixture was poured into water and extracted with CH<sub>2</sub>Cl<sub>2</sub>. The combined organic extracts were washed with brine, dried (MgSO<sub>4</sub>), and concentrated to dryness under vacuum. The crude product was purified by flash column chromatography (petroleum ether/ CH<sub>2</sub>Cl<sub>2</sub>=3:1) to give second generation alkene-focused dendron **5** as a yellow solid. <sup>1</sup>H NMR (500 MHz CDCl<sub>3</sub>): 7.31-7.39 (m, 12H, Ar), 7.10-7.27 (m, 12H, Ar), 7.01-7.09 (m, 20H, Ar), 6.65-6.71 (m, 1H, CH), 6.70 (d, J = 17.5Hz, 1H, CH=CH<sub>2</sub>), 5.18(d, J =11.0Hz, 1H, CH=CH<sub>2</sub>), MALDI/TOF MS: Calcd for C<sub>140</sub>H<sub>107</sub>N<sub>7</sub>: 1885.9, Found: 1887.2. Anal. Calcd for C<sub>140</sub>H<sub>107</sub>N<sub>7</sub>: C, 89.09; H, 5.71; N, 5.19; Found: C, 88.57; H, 5.52; N, 5.08.

**General reaction procedure for entries AnG0, AnG1 and AnG2:** In an oven-dried flask with stirbar, corresponding dendrons with alkene, 9,10-dibromoanthracene, K<sub>3</sub>PO<sub>4</sub> and Pd(OAc)<sub>2</sub> were dissolved in dry DMAc. The reaction mixture was heated to 110 °C in an oil bath and stirred for 24h at this temperature under N<sub>2</sub> atmosphere. After being cooled to room temperature, the reaction mixture was poured into the water and extracted with CH<sub>2</sub>Cl<sub>2</sub>. The combined organic extracts were washed with brine, dried (MgSO<sub>4</sub>), and concentrated to dryness under vacuum. The crude product was purified by flash column chromatography to obtain a yellow powdery product.

**Synthesis of compound AnG0:** 0.76 g (2.8 mmol) compound **3**, 0.336 g (1 mmol) 9,10-dibromoanthracene, 0.636 g (3 mmol) K<sub>3</sub>PO<sub>4</sub>, 5 mg Pd(OAc)<sub>2</sub>, and 10 ml DMAc were reacted according to the general procedure to obtain compound **AnG0** as a yellow solid (0.45 g, yield: 63 %). <sup>1</sup>H NMR (500 MHz CDCl<sub>3</sub>): 6.87 (d, J = 16.0 Hz, 2H, CH=CH), 7.05 (t, J = 6.5 Hz, 4H, Ar), 7.14–7.17 (m, 12 H, Ar), 7.29 (d, J = 7.0 Hz, 8H, Ar), 7.46–7.47 (m, 4H, An), 7.56 (d, J = 7.0 Hz, 4H, Ar), 7.82 (d, J = 16.0 Hz, 2H, CH=CH), 8.40–8.41 (m, 4H, Ar). <sup>13</sup>C NMR (125 MHz CDCl<sub>3</sub>): 148.15, 147.98, 137.29, 133.19, 131.94, 130.04, 129.75, 127.86, 126.95, 125.54, 124.93, 124.15, 123.77, 123.51. MALDI/TOF MS: Calcd for C<sub>54</sub>H<sub>40</sub>N<sub>2</sub>: 716.3, Found: 716.9. Anal. Calcd for C<sub>54</sub>H<sub>40</sub>N<sub>2</sub>: C, 90.47; H, 5.62; N, 3.91; Found: C, 90.39; H, 5.65; N, 3.86.

**Synthesis of compound AnG1:** 1.13 g (1.4 mmol) compound **4**, 0.168 g (0.5 mmol) 9,10-dibromoanthracene, 0.318 g (1.5 mmol) K<sub>3</sub>PO<sub>4</sub>, 5 mg Pd(OAc)<sub>2</sub>, and 15 ml DMAc were reacted according to the general procedure to obtain compound **AnG1** as a yellow solid (0.445 g, yield: 50%). <sup>1</sup>H NMR (500 MHz CDCl<sub>3</sub>): 6.90 (d, J =

16.5 Hz, 4H, CH=CH), 6.99-7.06 (m, 28H, Ar), 7.12 (d,  $J = 7.5$  Hz, 16H, Ar), 7.13-7.16 (m, 8H, Ar), 7.20-7.22 (m, 4H, Ar), 7.25-7.28 (m, 10H, Ar), 7.38 (d,  $J = 8.5$  Hz, 8H, Ar), 7.42 (d,  $J = 8.5$  Hz, 8H, Ar), 7.46-7.49 (m, 4H, Ar), 7.59 (d,  $J = 9.0$  Hz, 4H, Ar), 7.85 (d,  $J = 16.5$  Hz, 2H, CH=CH), 8.41-8.43 (m, 4H, An).  $^{13}\text{C}$  NMR (125 MHz  $\text{CDCl}_3$ ): 147.57, 147.14, 146.41, 136.82, 132.75, 132.60, 132.02, 131.77, 129.63, 129.27, 127.54, 127.27, 127.19, 126.97, 126.54, 126.44, 125.30, 125.17, 124.44, 124.36, 124.23, 123.68, 123.26, 122.97. MALDI/TOF MS: Calcd for  $\text{C}_{134}\text{H}_{100}\text{N}_6$ : 1792.8, Found: 1794.1. Anal. Calcd for  $\text{C}_{134}\text{H}_{100}\text{N}_6$ : C, 89.70; H, 5.62; N, 4.68; Found: C, 89.62; H, 5.70; N, 4.62.

**Synthesis of compound AnG2:** 1.32 g (0.7 mmol) compound **5**, 0.084 g (0.25 mmol) 9,10-dibromoanthracene, 0.159 g (0.75 mmol)  $\text{K}_3\text{PO}_4$ , 5mg  $\text{Pd}(\text{OAc})_2$ , and 5 ml DMAc were reacted according to the general procedure to obtain compound **AnG2** as a yellow solid (0.26 g, yield: 26%).  $^1\text{H}$  NMR (500 MHz  $\text{CDCl}_3$ ): 6.87-7.06 (m, 68H, Ar), 7.08-7.15 (m, 64H, Ar), 7.19-7.27 (m, 26H, Ar), 7.33-7.46(m, 48H, Ar), 7.46-7.48(m, 4H, An), 7.58 (d,  $J = 8.5$  Hz, 4H, Ar), 7.84 (d,  $J = 16.5$  Hz, 2H, CH=CH), 8.40-8.42 (m, 4H, An).  $^{13}\text{C}$  NMR (125 MHz  $\text{CDCl}_3$ ): 147.5, 147.1, 146.5, 146.4, 136.8, 132.7, 132.4, 132.3, 132.1, 131.8, 129.6, 129.5, 129.3, 129.0, 127.6, 127.2, 126.9, 126.7, 126.4, 125.2, 124.4, 124.3, 124.2, 123.9, 123.7, 123.2, 123.0. MALDI/TOF MS: Calcd for  $\text{C}_{294}\text{H}_{220}\text{N}_{14}$ : 3945.7, Found: 3947.7. Anal. Calcd for  $\text{C}_{294}\text{H}_{220}\text{N}_{14}$ : C, 89.42; H, 5.61; N, 4.97; Found: C, 89.35; H, 5.67; N, 4.95.

## 2. TEM images of microstructure of dendrimers and Dynamic Light Scattering (DLS) measurements

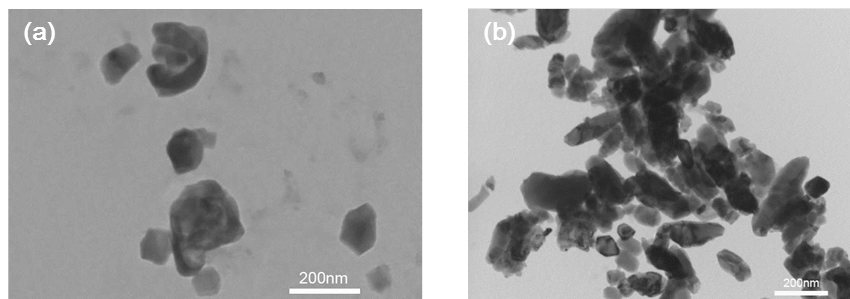

**Figure S1.** TEM image of the **AnG0** (a) and **AnG1** (b) nanoaggregates prepared in THF/ Water mixture (80% water volume fraction) at 5  $\mu\text{m}$ .

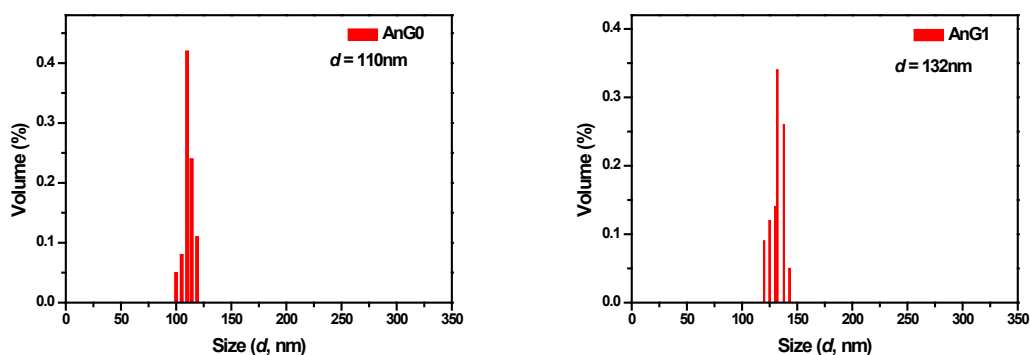

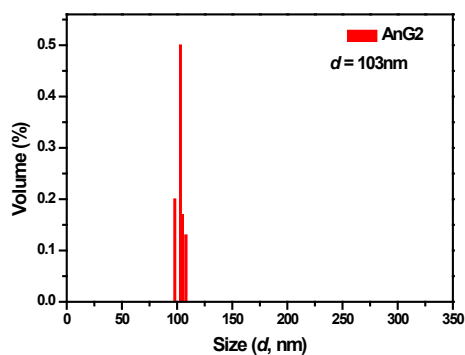

*Figure S2.* Dynamic light scattering image of dendrimers **AnG0**, **AnG1** and **AnG2** nanoaggregates dispersion in THF/Water mixture (80% water volume fraction) at 10  $\mu\text{m}$ .

### 3. Photophysical properties of dendrimers

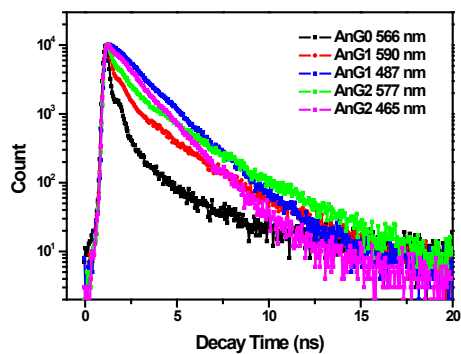

*Figure S3.* Time-resolved fluorescence of the dendrimers in THF solution, monitoring with different emission wavelength.

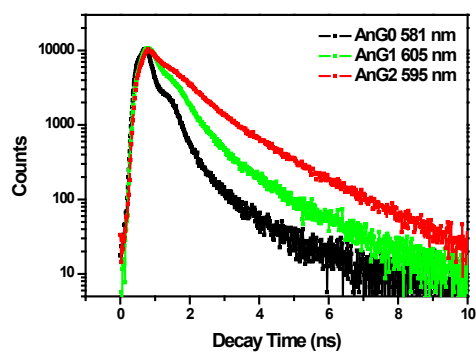

*Figure S4.* Time-resolved fluorescence of the dendrimers in thin film.

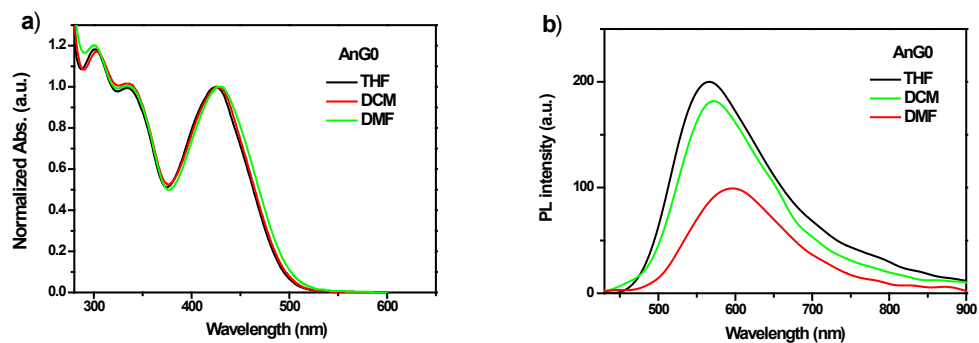

Figure S5. Solvatochromic behavior of AnG0 in different solvents (a) normalized absorption and (b) PL spectra.

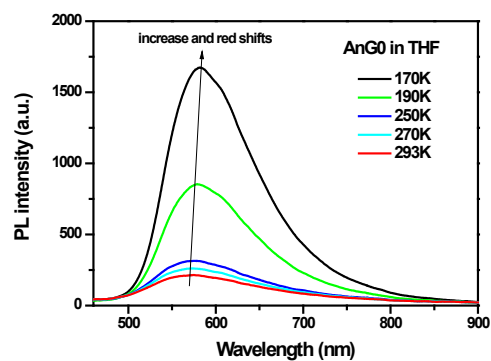

Figure S6. Temperature dependence of the emission spectra of AnG0 in THF solution ( $10^{-5}$ M)

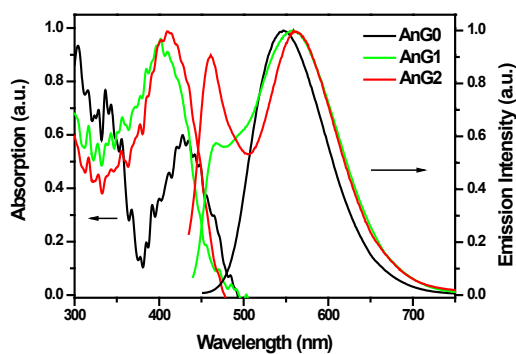

Figure S7. Normalized absorption and PL spectra of An-TPA dendrimer molecular dispersion in PMMA film (2% wt, monomer state)

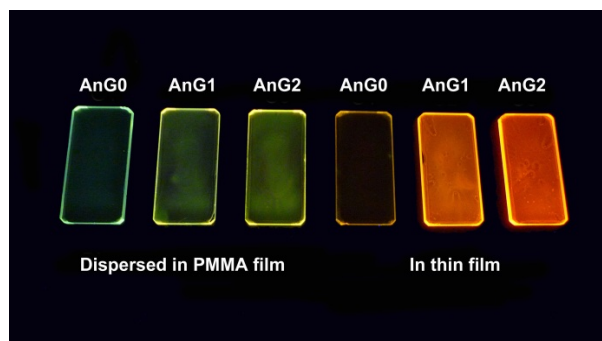

**Figure S8.** Fluorescence emission of all three dendrimers dispersed in PMMA film and in thin film under 365 nm illumination.

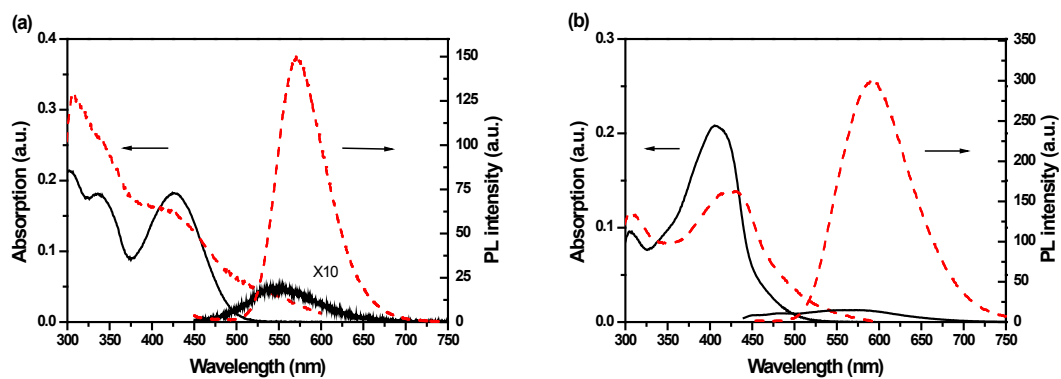

**Figure S9.** Absorption and photoluminescence spectra of G0 and G1 in the dilute THF solution (solid line) and in dispersion of the nanoaggregation form (THF/Water =1:8 v/v) at 10  $\mu$ M (dash line)

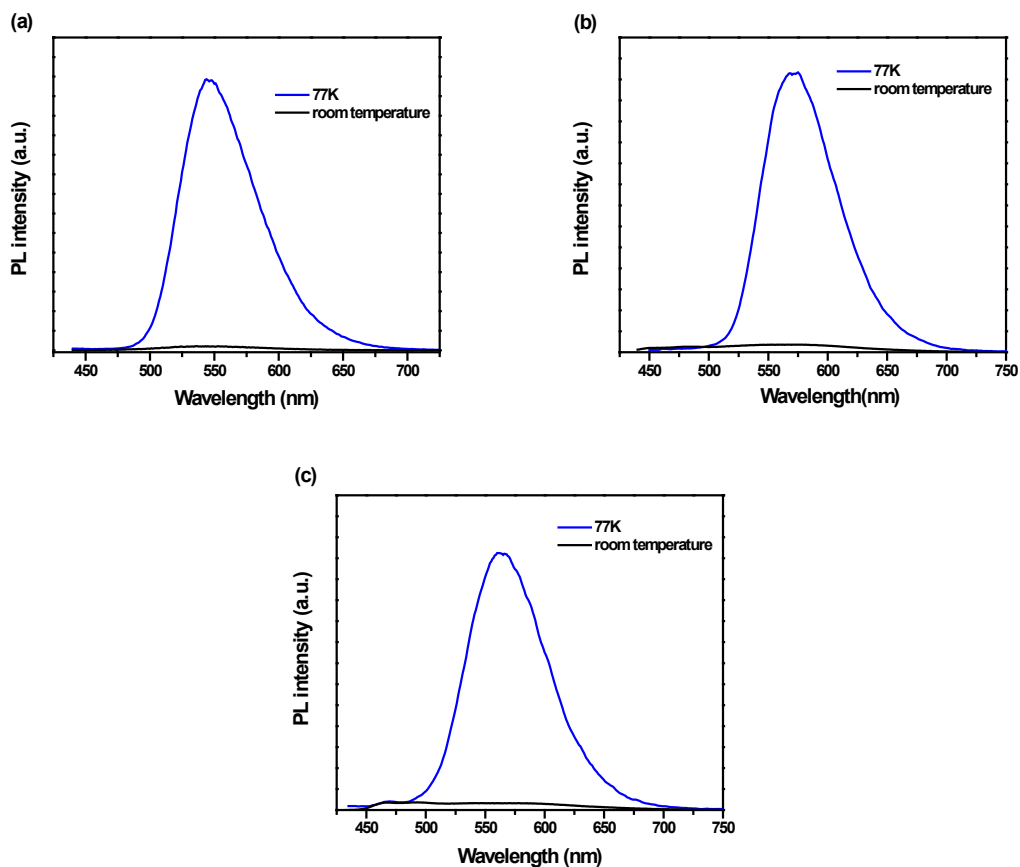

**Figure S10.** PL spectra of dendrimers **AnG0** (a), **AnG1** (b) and **AnG2** (c) at room temperature (free state) and 77 K (frozen state) in dilute THF solution ( $1 \times 10^{-5}$  mol)

**Table S1.** Fluorescence lifetime of the dendrimers in various conditions.

|             | solution <sup>a</sup>       |                        |          |          |              | film <sup>b</sup> |           |          |          |              |
|-------------|-----------------------------|------------------------|----------|----------|--------------|-------------------|-----------|----------|----------|--------------|
|             | $\lambda_{em}$ <sup>c</sup> | $A_1/A_2$ <sup>d</sup> | $\tau_1$ | $\tau_2$ | $\tau_{avg}$ | $\lambda_{em}$    | $A_1/A_2$ | $\tau_1$ | $\tau_2$ | $\tau_{avg}$ |
| <b>AnG0</b> | 566                         | 0.97/0.03              | 0.16     | 1.67     | 0.21         | 581               | 0.99/0.01 | 0.18     | 2.87     | 0.21         |
| <b>AnG1</b> | 487                         | 0.47/0.53              | 0.56     | 1.39     | 1.00         | 605               | 0.96/0.04 | 0.33     | 2.00     | 0.40         |
|             | 590                         | 0.90/0.10              | 0.24     | 1.96     | 0.41         |                   |           |          |          |              |
| <b>AnG2</b> | 465                         | 0.44/0.56              | 0.70     | 1.22     | 1.00         | 595               | 0.82/0.18 | 0.44     | 1.84     | 0.69         |
|             | 577                         | 0.82/0.18              | 0.41     | 1.82     | 0.67         |                   |           |          |          |              |

<sup>a</sup> In dilute THF solution at 10  $\mu$ M. <sup>b</sup> in thin film. <sup>c</sup> monitor emission wavelength. <sup>d</sup>  $A_1$  and  $A_2$  are preexponential factors representing the functional contributions to the time-resolved decay of the compounds with a lifetime  $\tau_1$  and  $\tau_2$ , respectively.

#### 4. Semiempirical Calculation Methods

All semiempirical calculations were performed using the Gaussian 03 package program. The ground-state geometry of the model structure in the gas phase was optimized semiempirically using the pm3 formalism.

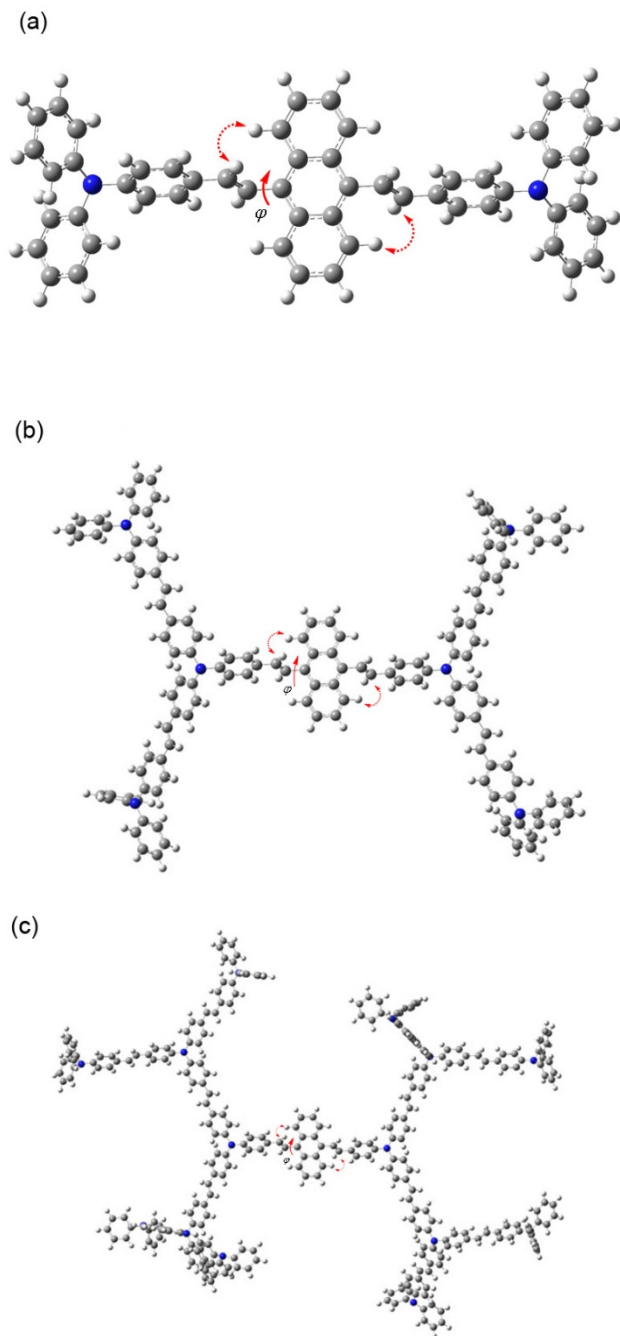

**Figure S11.** Semiempirical calculation (pm3 formalism) for G0 (a), G1 (b) and G2 (c) model structure Optimized geometries of the monomer from different viewpoints. The torsional angle is defined by four carbons and indicated by the solid arrows. Sterically hindered hydrogens are indicated by the dotted arrows.



6.  $^1\text{H}$  and  $^{13}\text{C}$  NMR spectra, MALDI-TOF MS data for dendrimers

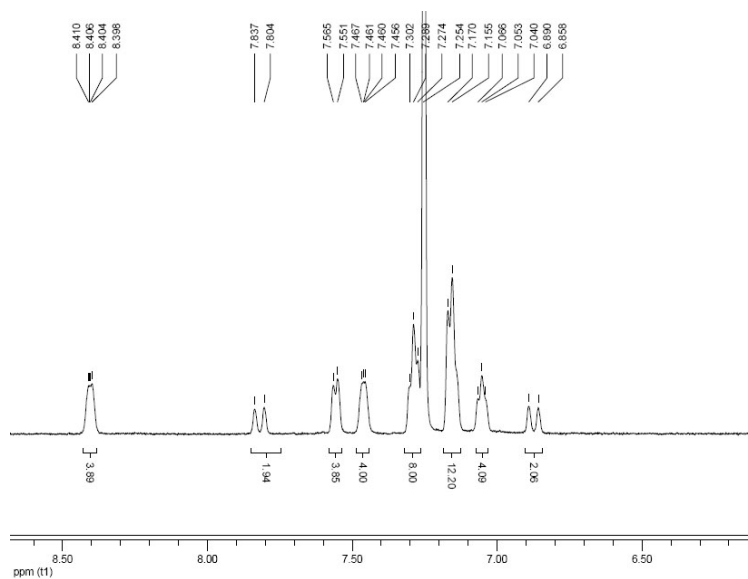

Figure S12.  $^1\text{H}$  NMR spectrum of AnG0

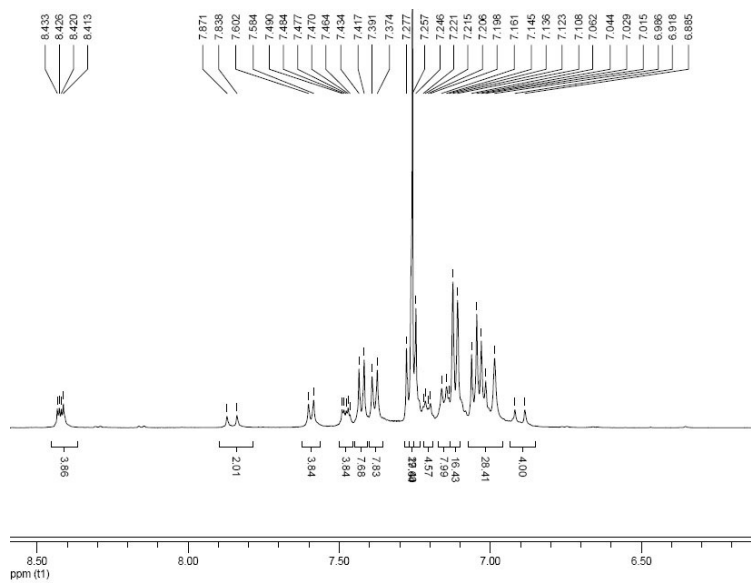

Figure S13.  $^1\text{H}$  NMR spectrum of AnG1

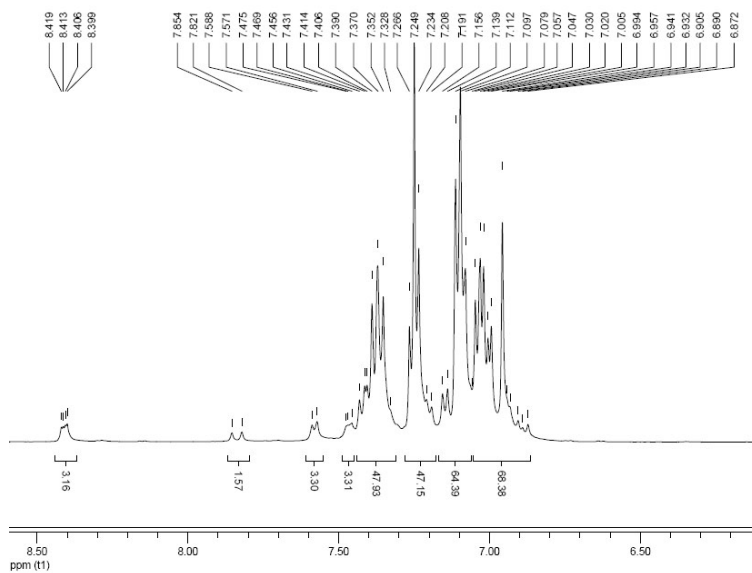

Figure S14. <sup>1</sup>H NMR spectrum of AnG2

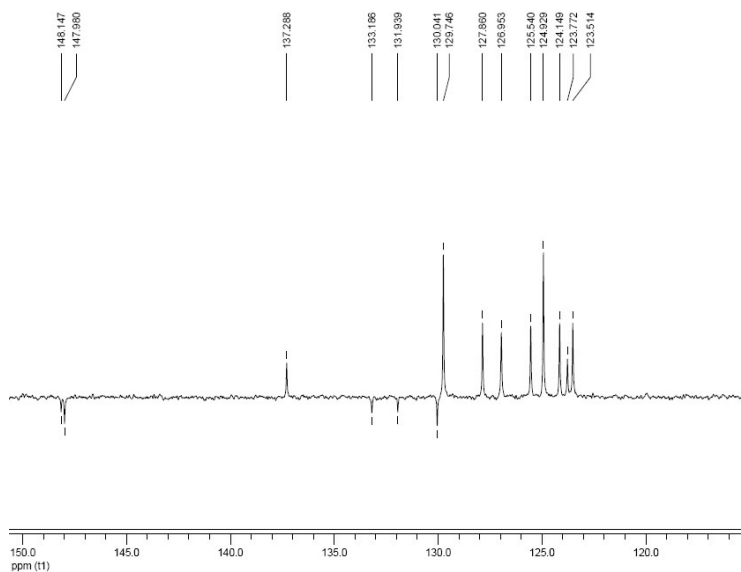

Figure S15. <sup>13</sup>C NMR spectrum of AnG0

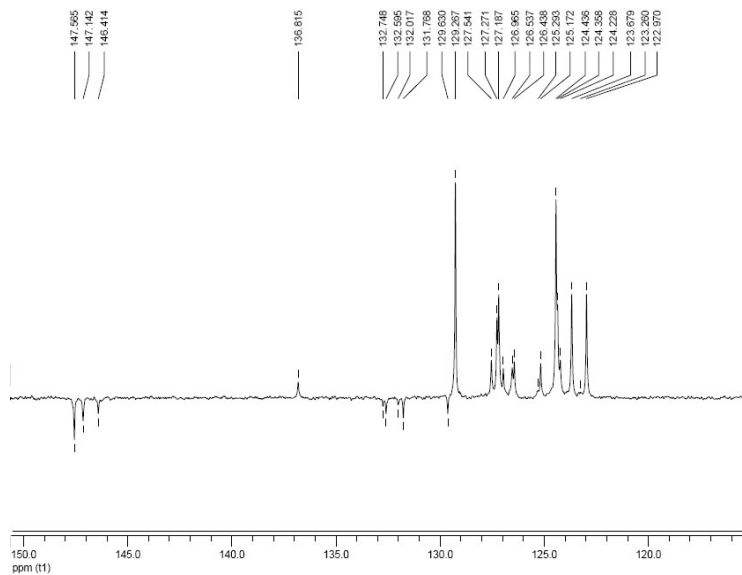

Figure S16. <sup>13</sup>C NMR spectrum of AnG1

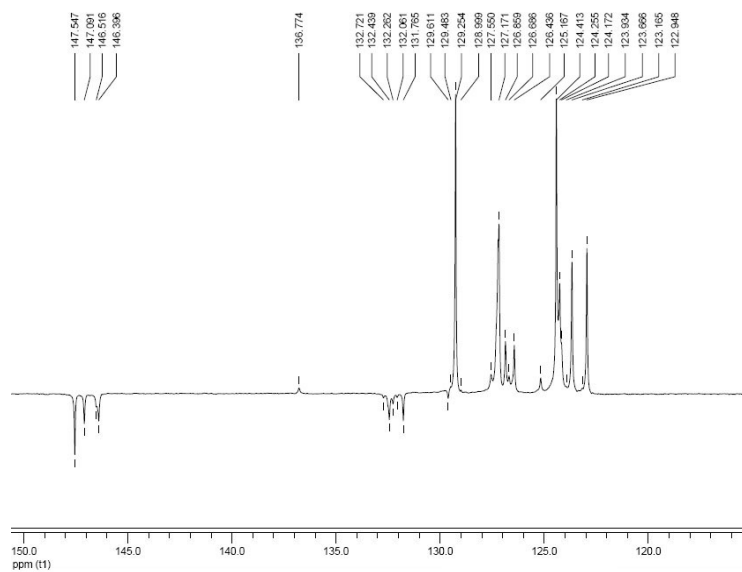

Figure S17. <sup>13</sup>C NMR spectrum of AnG2

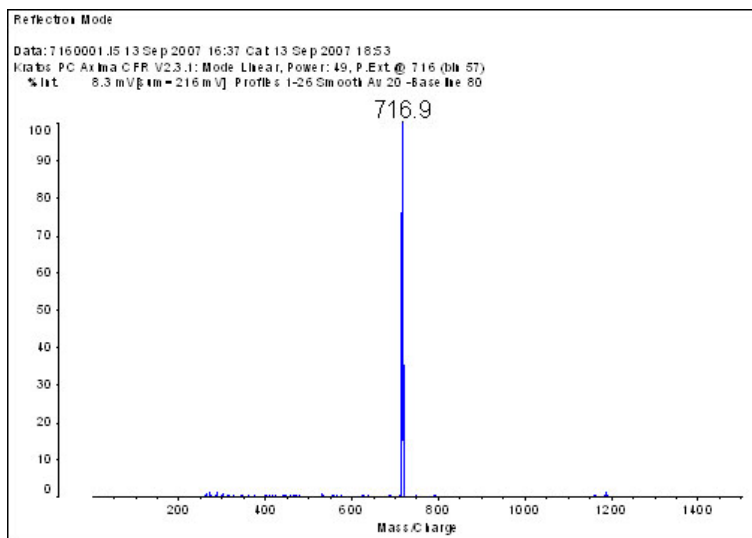

**Figure S18.** MALDI-TOF mass spectrum of **AnG0**

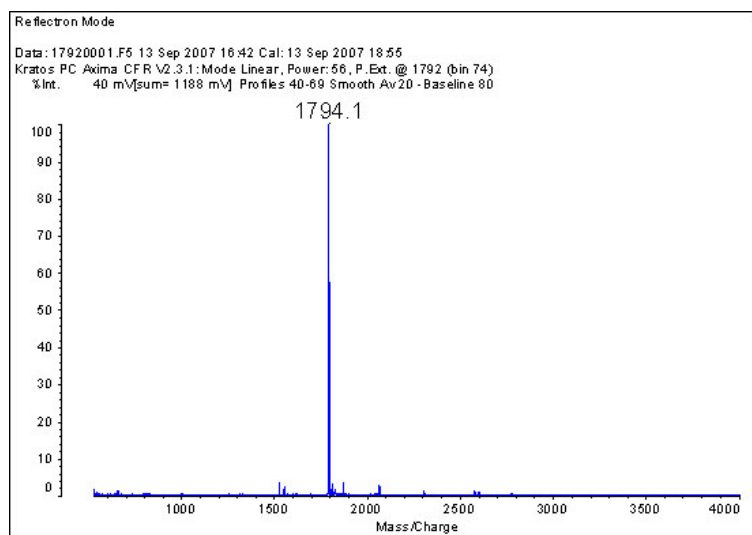

**Figure S19.** MALDI-TOF mass spectrum of **AnG1**

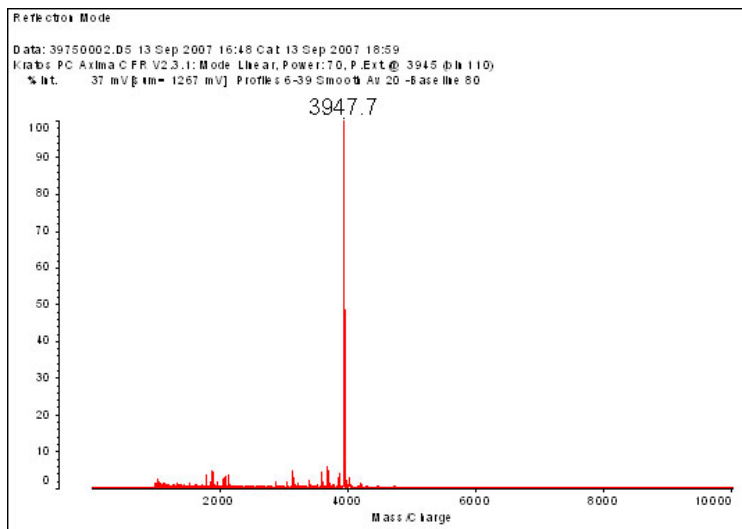

Figure S20. MALDI-TOF mass spectrum of AnG2

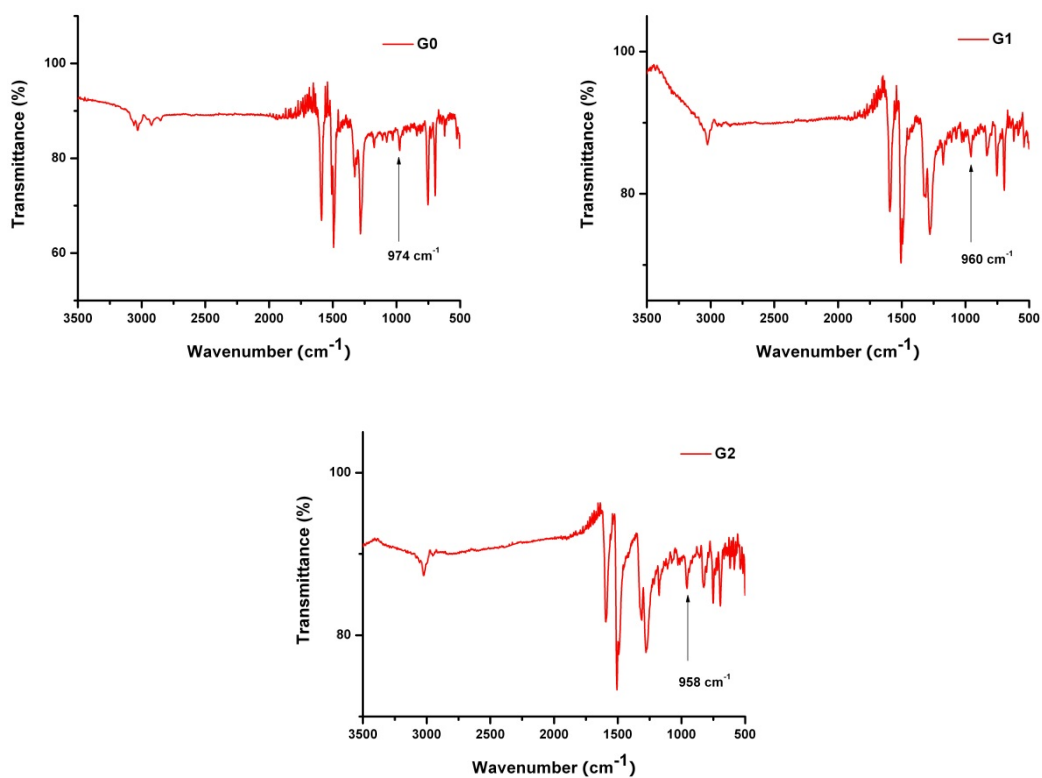

Figure S21. FR-IR spectra of dendrimers AnG0, AnG1 and AnG2.
